# Supplementary material
Source: HighWire-hosted journal article supplement (https://gh.bmj.com/content/7/1/e007190)
Supplement: inline-supplementary-material-2 [file inline-supplementary-material-2.pdf]

## Search strategy

### Strategy 1: Search terms for “children” and “adolescents”

child OR children OR adolescent OR students OR young adult OR youth OR teenager

### Strategy 2: Search terms for “COVID-19 pandemic”

covid 19 OR sars cov 2 OR severe acute respiratory syndrome coronavirus 2 OR coronavirus OR covid 19 pandemic OR novel coronavirus OR 2019 novel coronavirus OR 2019-nCoV OR SARS-CoV-2

### Strategy 3: Search terms for “lockdown”

lockdown OR restrictions OR quarantine OR segregation OR detachment OR confinement OR stay at home OR isolation OR social isolation OR self-isolation OR separation OR withdrawal OR seclusion

### Strategy 4: Search terms for “movement and play behaviors”

movement behaviors OR play behaviors OR physical activity OR exercise OR play\* OR walking OR running OR swimming OR cycling OR sports OR activity OR sedentary OR sedentary behavior OR inactive OR stationary OR screen time OR social media OR internet gaming OR sitting OR sleep\* or nap\* OR rest\*

((child OR children OR adolescent OR students OR young adult OR youth OR teenager) AND (covid 19 OR sars cov 2 OR severe acute respiratory syndrome coronavirus 2 OR coronavirus OR covid 19 pandemic OR novel coronavirus OR 2019 novel coronavirus OR 2019-nCoV OR SARS-CoV-2)) AND (lockdown OR restrictions OR quarantine OR segregation OR detachment OR confinement OR stay at home OR isolation OR social isolation OR self-isolation OR separation OR withdrawal OR seclusion)) AND (movement behaviors OR play behaviors OR physical activity OR exercise OR play\* OR walking OR running OR swimming OR cycling OR sports OR activity OR sedentary OR sedentary behavior OR inactive OR stationary OR screen time OR social media OR internet OR gaming OR sitting OR sleep\* or nap\* OR rest\*)

Search results from November 1, 2019 to March 30, 2021

Pubmed/MEDLINE: 1,667 → 1,331

Web of Science: 827 → 586

CINAHL: 184 → 83

Academic Search Complete: 4,645 → 4,262

PsycArticles: 170 → 162

PsycINFO: 136 → 59

SocINDEX: 283 → 191

CENTRAL: 6 → 5

TOTAL: 7,918 → 6,679

Duplicates: 1,239

#### Pubmed/MEDLINE

"TX ( child OR children OR adolescent OR students OR young adult OR youth OR teenager ) AND TX ( covid 19 OR sars cov 2 OR severe acute respiratory syndrome coronavirus 2 OR coronavirus OR covid 19 pandemic OR novel coronavirus OR 2019 novel coronavirus OR 2019-nCoV OR SARS-CoV-2 ) AND TX ( lockdown OR restrictions OR quarantine OR segregation OR detachment OR confinement OR stay at home OR isolation OR social isolation OR self-isolation OR separation OR withdrawal OR seclusion ) AND TX ( movement behaviors OR play behaviors OR physical activity OR exercise OR play\* OR walking OR running OR swimming OR cycling OR sports OR activity OR sedentary OR sedentary behavior OR inactive OR stationary OR screen time OR social media OR internet gaming OR sitting OR sleep\* or nap\* OR rest\* ) Scholarly (Peer Reviewed) Journals; Date of Publication: 20191101-20210331; Abstract Available; English Language; Language: English AND Apply equivalent subjects on 2021-03-30 05:17 AM"

#### Web of Science

**TOPIC:** (child OR children OR adolescent OR students OR young adult OR youth OR teenager) **AND TOPIC:** (covid 19 OR sars cov 2 OR severe acute respiratory syndrome coronavirus 2 OR coronavirus OR covid 19 pandemic OR novel coronavirus OR 2019 novel coronavirus OR 2019-nCoV OR SARS-CoV-2) **AND TOPIC:** (lockdown OR restrictions OR quarantine OR segregation OR detachment OR confinement OR stay at home OR isolation OR social isolation OR self-isolation OR separation OR withdrawal OR seclusion) **AND TOPIC:** (movement behaviors OR play behaviors OR physical activity OR exercise OR play\* OR walking OR running OR swimming OR cycling OR sports OR activity OR sedentary OR sedentary behavior OR inactive OR stationary OR screen time OR social media OR internet gaming OR sitting OR sleep\* or nap\* OR rest\*)

**Refined by: DOCUMENT TYPES:** (ARTICLE) **AND LANGUAGES:** (ENGLISH)

*Indexes=SCI-EXPANDED, SSCI, A&HCI, CPCI-S, CPCI-SSH, BKCI-S, BKCI-SSH, ESCI, CCR-EXPANDED, IC Timespan=2019-2021*

#### CINAHL

"TX ( child OR children OR adolescent OR students OR young adult OR youth OR teenager ) AND TX ( covid 19 OR sars cov 2 OR severe acute respiratory syndrome coronavirus 2 OR coronavirus OR covid 19 pandemic OR novel coronavirus OR 2019 novel coronavirus OR 2019-nCoV OR SARS-CoV-2 ) AND TX ( lockdown OR restrictions OR quarantine OR segregation OR detachment OR confinement OR stay at home OR isolation OR social isolation OR self-isolation OR separation OR withdrawal OR seclusion ) AND TX ( movement behaviors OR play behaviors OR physical activity OR exercise OR play\* OR walking OR running OR swimming OR cycling OR sports OR activity OR sedentary OR sedentary behavior OR inactive OR stationary OR screen time OR social media OR internet gaming OR sitting OR sleep\* or nap\* OR rest\* ) Full Text; Abstract Available; Published Date: 20191101-20210331; English Language; Peer Reviewed; Research Article; Language: English AND Apply equivalent subjects on 2021-03-30 05:14 AM"

#### Academic Search Complete

"TX ( child OR children OR adolescent OR students OR young adult OR youth OR teenager ) AND TX ( covid 19 OR sars cov 2 OR severe acute respiratory syndrome coronavirus 2 OR coronavirus OR covid 19 pandemic OR novel coronavirus OR 2019 novel coronavirus OR 2019-nCoV OR SARS-CoV-2 ) AND TX ( lockdown OR restrictions OR quarantine OR segregation OR detachment OR confinement OR stay at home OR isolation OR social isolation OR self-isolation OR separation OR withdrawal OR seclusion ) AND TX ( movement behaviors OR play behaviors OR physical activity OR exercise OR play\* OR walking OR running OR swimming OR cycling OR sports OR activity OR sedentary OR sedentary behavior OR inactive OR stationary OR screen time OR social media OR internet gaming OR sitting OR sleep\* or nap\* OR rest\* ) Full Text;

Scholarly (Peer Reviewed) Journals; Published Date: 20191101-20210331; Document Type: Article; Language: English AND Apply equivalent subjects on 2021-03-30 05:09 AM"

### PsycArticles

"TX ( child OR children OR adolescent OR students OR young adult OR youth OR teenager ) AND TX ( covid 19 OR sars cov 2 OR severe acute respiratory syndrome coronavirus 2 OR coronavirus OR covid 19 pandemic OR novel coronavirus OR 2019 novel coronavirus OR 2019-nCoV OR SARS-CoV-2 ) AND TX ( lockdown OR restrictions OR quarantine OR segregation OR detachment OR confinement OR stay at home OR isolation OR social isolation OR self-isolation OR separation OR withdrawal OR seclusion ) AND TX ( movement behaviors OR play behaviors OR physical activity OR exercise OR play\* OR walking OR running OR swimming OR cycling OR sports OR activity OR sedentary OR sedentary behavior OR inactive OR stationary OR screen time OR social media OR internet gaming OR sitting OR sleep\* or nap\* OR rest\* ) Full Text; Published Date: 20191101-20210331; Scholarly (Peer Reviewed) Journals; Publication Status: Fully Published; Document Type: Journal Article AND Apply equivalent subjects on 2021-03-30 05:02 AM"

### PsycINFO

"TX ( child OR children OR adolescent OR students OR young adult OR youth OR teenager ) AND TX ( covid 19 OR sars cov 2 OR severe acute respiratory syndrome coronavirus 2 OR coronavirus OR covid 19 pandemic OR novel coronavirus OR 2019 novel coronavirus OR 2019-nCoV OR SARS-CoV-2 ) AND TX ( lockdown OR restrictions OR quarantine OR segregation OR detachment OR confinement OR stay at home OR isolation OR social isolation OR self-isolation OR separation OR withdrawal OR seclusion ) AND TX ( movement behaviors OR play behaviors OR physical activity OR exercise OR play\* OR walking OR running OR swimming OR cycling OR sports OR activity OR sedentary OR sedentary behavior OR inactive OR stationary OR screen time OR social media OR internet gaming OR sitting OR sleep\* or nap\* OR rest\* ) Published Date: 20191101-20210331; Peer Reviewed; Publication Status: fully published; English; Language: English AND Apply equivalent subjects on 2021-03-30 05:20 AM"

### SocINDEX

"TX ( child OR children OR adolescent OR students OR young adult OR youth OR teenager ) AND TX ( covid 19 OR sars cov 2 OR severe acute respiratory syndrome coronavirus 2 OR coronavirus OR covid 19 pandemic OR novel coronavirus OR 2019 novel coronavirus OR 2019 nCoV OR SARS CoV 2 ):ti,ab,kw AND (lockdown OR restrictions OR quarantine OR segregation OR detachment OR confinement OR stay at home OR isolation OR social isolation OR self-isolation OR separation OR withdrawal OR seclusion):ti,ab,kw AND (movement behaviors OR play behaviors OR physical activity OR exercise OR play\* OR walking OR running OR swimming OR cycling OR sports OR activity OR sedentary OR sedentary behavior OR inactive OR stationary OR screen time OR social media OR internet gaming OR sitting OR sleep\* or nap\* OR rest\* ) Full Text; Scholarly (Peer Reviewed) Journals; Date of Publication: 20191101-20210331; Document Type: Article; Language: English AND Apply equivalent subjects on 2021-03-30 05:25 AM"

### CENTRAL

(child OR children OR adolescent OR students OR young adult OR youth OR teenager):ti,ab,kw AND (covid 19 OR sars cov 2 OR severe acute respiratory syndrome coronavirus 2 OR coronavirus OR covid 19 pandemic OR novel coronavirus OR 2019 novel coronavirus OR 2019 nCoV OR SARS CoV 2 ):ti,ab,kw AND (lockdown OR restrictions OR quarantine OR segregation OR detachment OR confinement OR stay at home OR isolation OR social isolation OR self-isolation OR separation OR withdrawal OR seclusion):ti,ab,kw AND (movement behaviors OR play behaviors OR physical activity OR exercise OR play\* OR walking OR running OR swimming OR cycling OR sports OR activity OR sedentary OR sedentary behavior OR inactive OR stationary OR screen time OR social media OR internet gaming OR sitting OR sleep\* or nap\* OR rest\*):ti,ab,kw (Word variations have been searched)" in Cochrane Reviews, Clinical Answers, Editorials, Special Collections (Word variations have been searched)

Search results from April 1 to September 24, 2021

Pubmed/MEDLINE: 1,436 → 1,428

Web of Science: 761 → 758  
CINAHL: 125 → 0  
Academic Search Complete: 3,127 → 2,937  
PsycArticles: 82 → 79  
PsycINFO: 41 → 24  
SocINDEX: 139 → 130  
CENTRAL: 0 → 0

TOTAL: 5,711 → 5,356

Duplicates: 355

#### Pubmed/MEDLINE

"TX ( child OR children OR adolescent OR students OR young adult OR youth OR teenager ) AND TX ( covid 19 OR sars cov 2 OR severe acute respiratory syndrome coronavirus 2 OR coronavirus OR covid 19 pandemic OR novel coronavirus OR 2019 novel coronavirus OR 2019-nCoV OR SARS-CoV-2 ) AND TX ( lockdown OR restrictions OR quarantine OR segregation OR detachment OR confinement OR stay at home OR isolation OR social isolation OR self-isolation OR separation OR withdrawal OR seclusion ) AND TX ( movement behaviors OR play behaviors OR physical activity OR exercise OR play\* OR walking OR running OR swimming OR cycling OR sports OR activity OR sedentary OR sedentary behavior OR inactive OR stationary OR screen time OR social media OR internet gaming OR sitting OR sleep\* or nap\* OR rest\* ) Scholarly (Peer Reviewed) Journals; Date of Publication: 20210401-20210931; Abstract Available; English Language; Language: English AND Apply equivalent subjects on 2021-09-24 08:19 AM"

#### Web of Science

child OR children OR adolescent OR students OR young adult OR youth OR teenager (Topic) and covid 19 OR sars cov 2 OR severe acute respiratory syndrome coronavirus 2 OR coronavirus OR covid 19 pandemic OR novel coronavirus OR 2019 novel coronavirus OR 2019-nCoV OR SARS-CoV-2 (Topic) and lockdown OR restrictions OR quarantine OR segregation OR detachment OR confinement OR stay at home OR isolation OR social isolation OR self-isolation OR separation OR withdrawal OR seclusion (Topic) and movement behaviors OR play behaviors OR physical activity OR exercise OR play\* OR walking OR running OR swimming OR cycling OR sports OR activity OR sedentary OR sedentary behavior OR inactive OR stationary OR screen time OR social media OR internet gaming OR sitting OR sleep\* or nap\* OR rest\* (Topic) and Articles (Document Types) and English (Languages)

#### CINAHL

"TX ( child OR children OR adolescent OR students OR young adult OR youth OR teenager ) AND TX ( covid 19 OR sars cov 2 OR severe acute respiratory syndrome coronavirus 2 OR coronavirus OR covid 19 pandemic OR novel coronavirus OR 2019 novel coronavirus OR 2019-nCoV OR SARS-CoV-2 ) AND TX ( lockdown OR restrictions OR quarantine OR segregation OR detachment OR confinement OR stay at home OR isolation OR social isolation OR self-isolation OR separation OR withdrawal OR seclusion ) AND TX ( movement behaviors OR play behaviors OR physical activity OR exercise OR play\* OR walking OR running OR swimming OR cycling OR sports OR activity OR sedentary OR sedentary behavior OR inactive OR stationary OR screen time OR social media OR internet gaming OR sitting OR sleep\* or nap\* OR rest\* ) Full Text; Abstract Available; Published Date: 20210401-20210931; English Language; Peer Reviewed; Research Article; Language: English AND Apply equivalent subjects on 2021-09-24 02:33 AM"

#### Academic Search Complete

"TX ( child OR children OR adolescent OR students OR young adult OR youth OR teenager ) AND TX ( covid 19 OR sars cov 2 OR severe acute respiratory syndrome coronavirus 2 OR coronavirus OR covid 19 pandemic OR novel coronavirus OR 2019 novel coronavirus OR 2019-nCoV OR SARS-CoV-2 ) AND TX ( lockdown

OR restrictions OR quarantine OR segregation OR detachment OR confinement OR stay at home OR isolation OR social isolation OR self-isolation OR separation OR withdrawal OR seclusion ) AND TX ( movement behaviors OR play behaviors OR physical activity OR exercise OR play\* OR walking OR running OR swimming OR cycling OR sports OR activity OR sedentary OR sedentary behavior OR inactive OR stationary OR screen time OR social media OR internet gaming OR sitting OR sleep\* or nap\* OR rest\* ) Full Text; Scholarly (Peer Reviewed) Journals; Published Date: 20210401-20210931; Document Type: Article; Language: English AND Apply equivalent subjects on 2021-09-24 08:31 AM"

### PsycArticles

"TX ( child OR children OR adolescent OR students OR young adult OR youth OR teenager ) AND TX ( covid 19 OR sars cov 2 OR severe acute respiratory syndrome coronavirus 2 OR coronavirus OR covid 19 pandemic OR novel coronavirus OR 2019 novel coronavirus OR 2019-nCoV OR SARS-CoV-2 ) AND TX ( lockdown OR restrictions OR quarantine OR segregation OR detachment OR confinement OR stay at home OR isolation OR social isolation OR self-isolation OR separation OR withdrawal OR seclusion ) AND TX ( movement behaviors OR play behaviors OR physical activity OR exercise OR play\* OR walking OR running OR swimming OR cycling OR sports OR activity OR sedentary OR sedentary behavior OR inactive OR stationary OR screen time OR social media OR internet gaming OR sitting OR sleep\* or nap\* OR rest\* ) Full Text; Published Date: 20210401-20210931; Scholarly (Peer Reviewed) Journals; Publication Status: Fully Published; Document Type: Journal Article AND Apply equivalent subjects on 2021-09-24 08:42 AM"

### PsycINFO

"TX ( child OR children OR adolescent OR students OR young adult OR youth OR teenager ) AND TX ( covid 19 OR sars cov 2 OR severe acute respiratory syndrome coronavirus 2 OR coronavirus OR covid 19 pandemic OR novel coronavirus OR 2019 novel coronavirus OR 2019-nCoV OR SARS-CoV-2 ) AND TX ( lockdown OR restrictions OR quarantine OR segregation OR detachment OR confinement OR stay at home OR isolation OR social isolation OR self-isolation OR separation OR withdrawal OR seclusion ) AND TX ( movement behaviors OR play behaviors OR physical activity OR exercise OR play\* OR walking OR running OR swimming OR cycling OR sports OR activity OR sedentary OR sedentary behavior OR inactive OR stationary OR screen time OR social media OR internet gaming OR sitting OR sleep\* or nap\* OR rest\* ) Published Date: 20210401-20210931; Peer Reviewed; Publication Status: fully published; English; Language: English AND Apply equivalent subjects on 2021-09-24 10:34 AM"

### SocINDEX

"TX ( child OR children OR adolescent OR students OR young adult OR youth OR teenager ) AND TX ( covid 19 OR sars cov 2 OR severe acute respiratory syndrome coronavirus 2 OR coronavirus OR covid 19 pandemic OR novel coronavirus OR 2019 novel coronavirus OR 2019-nCoV OR SARS-CoV-2 ) AND TX ( lockdown OR restrictions OR quarantine OR segregation OR detachment OR confinement OR stay at home OR isolation OR social isolation OR self-isolation OR separation OR withdrawal OR seclusion ) AND TX ( movement behaviors OR play behaviors OR physical activity OR exercise OR play\* OR walking OR running OR swimming OR cycling OR sports OR activity OR sedentary OR sedentary behavior OR inactive OR stationary OR screen time OR social media OR internet gaming OR sitting OR sleep\* or nap\* OR rest\* ) Full Text; Scholarly (Peer Reviewed) Journals; Date of Publication: 20210401-20210931; Document Type: Article; Language: English AND Apply equivalent subjects on 2021-09-24 10:42 AM"

Search results from September 1 to December 10, 2021

Pubmed/MEDLINE: 143 → 143

Web of Science: 50 → 47

CINAHL: 54 → 43

Academic Search Complete: 180 → 170

PsycArticles: 87 → 86

PsycINFO: 23 → 23

SocINDEX: 75 → 73

CENTRAL: 0 → 0

TOTAL: 612 → 585

Duplicates: 27

#### Pubmed/MEDLINE

"TX ( child OR children OR adolescent OR students OR young adult OR youth OR teenager ) AND TX ( covid 19 OR sars cov 2 OR severe acute respiratory syndrome coronavirus 2 OR coronavirus OR covid 19 pandemic OR novel coronavirus OR 2019 novel coronavirus OR 2019-nCoV OR SARS-CoV-2 ) AND TX ( lockdown OR restrictions OR quarantine OR segregation OR detachment OR confinement OR stay at home OR isolation OR social isolation OR self-isolation OR separation OR withdrawal OR seclusion ) AND TX ( movement behaviors OR play behaviors OR physical activity OR exercise OR play\* OR walking OR running OR swimming OR cycling OR sports OR activity OR sedentary OR sedentary behavior OR inactive OR stationary OR screen time OR social media OR internet gaming OR sitting OR sleep\* or nap\* OR rest\* ) Scholarly (Peer Reviewed) Journals; Date of Publication: 20210901-20211231; Abstract Available; English Language; Language: English AND Apply equivalent subjects on 2021-12-10 03:14 AM"

#### Web of Science

**TOPIC:** (child OR children OR adolescent OR students OR young adult OR youth OR teenager) **AND TOPIC:** (covid 19 OR sars cov 2 OR severe acute respiratory syndrome coronavirus 2 OR coronavirus OR covid 19 pandemic OR novel coronavirus OR 2019 novel coronavirus OR 2019-nCoV OR SARS-CoV-2) **AND TOPIC:** (lockdown OR restrictions OR quarantine OR segregation OR detachment OR confinement OR stay at home OR isolation OR social isolation OR self-isolation OR separation OR withdrawal OR seclusion) **AND TOPIC:** (movement behaviors OR play behaviors OR physical activity OR exercise OR play\* OR walking OR running OR swimming OR cycling OR sports OR activity OR sedentary OR sedentary behavior OR inactive OR stationary OR screen time OR social media OR internet gaming OR sitting OR sleep\* or nap\* OR rest\*)

**Refined by: DOCUMENT TYPES:** (ARTICLE) **AND LANGUAGES:** (ENGLISH)

*Indexes=SCI-EXPANDED, SSCI, A&HCI, CPCI-S, CPCI-SSH, BKCI-S, BKCI-SSH, ESCI, CCR-EXPANDED, IC Timespan=2021-2021*

#### CINAHL

"TX ( child OR children OR adolescent OR students OR young adult OR youth OR teenager ) AND TX ( covid 19 OR sars cov 2 OR severe acute respiratory syndrome coronavirus 2 OR coronavirus OR covid 19 pandemic OR novel coronavirus OR 2019 novel coronavirus OR 2019-nCoV OR SARS-CoV-2 ) AND TX ( lockdown OR restrictions OR quarantine OR segregation OR detachment OR confinement OR stay at home OR isolation OR social isolation OR self-isolation OR separation OR withdrawal OR seclusion ) AND TX ( movement behaviors OR play behaviors OR physical activity OR exercise OR play\* OR walking OR running OR swimming OR cycling OR sports OR activity OR sedentary OR sedentary behavior OR inactive OR stationary OR screen time OR social media OR internet gaming OR sitting OR sleep\* or nap\* OR rest\* ) Full Text; Abstract Available; Published Date: 20210901-20211231; English Language; Peer Reviewed; Research Article; Language: English AND Apply equivalent subjects on 2021-12-10 05:17 AM"

#### Academic Search Complete

"TX ( child OR children OR adolescent OR students OR young adult OR youth OR teenager ) AND TX ( covid 19 OR sars cov 2 OR severe acute respiratory syndrome coronavirus 2 OR coronavirus OR covid 19 pandemic OR novel coronavirus OR 2019 novel coronavirus OR 2019-nCoV OR SARS-CoV-2 ) AND TX ( lockdown OR restrictions OR quarantine OR segregation OR detachment OR confinement OR stay at home OR isolation OR social isolation OR self-isolation OR separation OR withdrawal OR seclusion ) AND TX ( movement behaviors OR play behaviors OR physical activity OR exercise OR play\* OR walking OR running OR swimming OR cycling OR sports OR activity OR sedentary OR sedentary behavior OR inactive OR stationary

OR screen time OR social media OR internet gaming OR sitting OR sleep\* or nap\* OR rest\* ) Full Text; Scholarly (Peer Reviewed) Journals; Published Date: 20210901-20211231; Document Type: Article; Language: English AND Apply equivalent subjects on 2021-12-10 05:00 AM"

### PsycArticles

"TX ( child OR children OR adolescent OR students OR young adult OR youth OR teenager ) AND TX ( covid 19 OR sars cov 2 OR severe acute respiratory syndrome coronavirus 2 OR coronavirus OR covid 19 pandemic OR novel coronavirus OR 2019 novel coronavirus OR 2019-nCoV OR SARS-CoV-2 ) AND TX ( lockdown OR restrictions OR quarantine OR segregation OR detachment OR confinement OR stay at home OR isolation OR social isolation OR self-isolation OR separation OR withdrawal OR seclusion ) AND TX ( movement behaviors OR play behaviors OR physical activity OR exercise OR play\* OR walking OR running OR swimming OR cycling OR sports OR activity OR sedentary OR sedentary behavior OR inactive OR stationary OR screen time OR social media OR internet gaming OR sitting OR sleep\* or nap\* OR rest\* ) Full Text; Published Date: 20210901-20211231; Scholarly (Peer Reviewed) Journals; Publication Status: Fully Published; Document Type: Journal Article AND Apply equivalent subjects on 2021-12-10 04:12 AM"

### PsycINFO

"TX ( child OR children OR adolescent OR students OR young adult OR youth OR teenager ) AND TX ( covid 19 OR sars cov 2 OR severe acute respiratory syndrome coronavirus 2 OR coronavirus OR covid 19 pandemic OR novel coronavirus OR 2019 novel coronavirus OR 2019-nCoV OR SARS-CoV-2 ) AND TX ( lockdown OR restrictions OR quarantine OR segregation OR detachment OR confinement OR stay at home OR isolation OR social isolation OR self-isolation OR separation OR withdrawal OR seclusion ) AND TX ( movement behaviors OR play behaviors OR physical activity OR exercise OR play\* OR walking OR running OR swimming OR cycling OR sports OR activity OR sedentary OR sedentary behavior OR inactive OR stationary OR screen time OR social media OR internet gaming OR sitting OR sleep\* or nap\* OR rest\* ) Published Date: 20210901-20211231; Peer Reviewed; Publication Status: fully published; English; Language: English AND Apply equivalent subjects on 2021-12-10 04:37 AM"

### SocINDEX

"TX ( child OR children OR adolescent OR students OR young adult OR youth OR teenager ) AND TX ( covid 19 OR sars cov 2 OR severe acute respiratory syndrome coronavirus 2 OR coronavirus OR covid 19 pandemic OR novel coronavirus OR 2019 novel coronavirus OR 2019-nCoV OR SARS-CoV-2 ) AND TX ( lockdown OR restrictions OR quarantine OR segregation OR detachment OR confinement OR stay at home OR isolation OR social isolation OR self-isolation OR separation OR withdrawal OR seclusion ) AND TX ( movement behaviors OR play behaviors OR physical activity OR exercise OR play\* OR walking OR running OR swimming OR cycling OR sports OR activity OR sedentary OR sedentary behavior OR inactive OR stationary OR screen time OR social media OR internet gaming OR sitting OR sleep\* or nap\* OR rest\* ) Full Text; Scholarly (Peer Reviewed) Journals; Date of Publication: 20210901-20211231; Document Type: Article; Language: English AND Apply equivalent subjects on 2021-12-10 04:55 AM"

### CENTRAL

(child OR children OR adolescent OR students OR young adult OR youth OR teenager):ti,ab,kw AND (covid 19 OR sars cov 2 OR severe acute respiratory syndrome coronavirus 2 OR coronavirus OR covid 19 pandemic OR novel coronavirus OR 2019 novel coronavirus OR 2019 nCoV OR SARS CoV 2):ti,ab,kw AND (lockdown OR restrictions OR quarantine OR segregation OR detachment OR confinement OR stay at home OR isolation OR social isolation OR self-isolation OR separation OR withdrawal OR seclusion):ti,ab,kw AND (movement behaviors OR play behaviors OR physical activity OR exercise OR play\* OR walking OR running OR swimming OR cycling OR sports OR activity OR sedentary OR sedentary behavior OR inactive OR stationary OR screen time OR social media OR internet gaming OR sitting OR sleep\* or nap\* OR rest\*):ti,ab,kw (Word variations have been searched)" in Cochrane Reviews, Clinical Answers, Editorials, Special Collections (Word variations have been searched)
