# Supplementary material
Source: HighWire-hosted journal article supplement (https://gh.bmj.com/content/7/1/e007190)
Supplement: inline-supplementary-material-4 [file inline-supplementary-material-4.pdf]

Supplementary Table 1: List of excluded studies

| Citation                                                                                                                                                                                                                                                        | Reason for exclusion |
|-----------------------------------------------------------------------------------------------------------------------------------------------------------------------------------------------------------------------------------------------------------------|----------------------|
| Alves JM, Yunker AG, DeFendis A, et al. BMI status and associations between affect, physical activity and anxiety among U.S. children during COVID-19. <i>Pediatr Obes.</i> 2021;16(9):e12786.                                                                  | Not relevant to PICO |
| Argiansya F, Soedjadhi R, Indra RM, et al. Electronic media use and sleep disorders among adolescents during the COVID-19 pandemic. <i>Sleep Disord.</i> 2021;2096944. doi: 10.1155/2021/2096944.                                                               | Not relevant to PICO |
| Aristovnik A, Keržič D, Ravšelj D. Impacts of the COVID-19 Pandemic on Life of Higher Education Students: A Global Perspective. <i>Sustainability.</i> 2020;12:8438.                                                                                            | Not relevant to PICO |
| Babu TA, Selvapandiyan J. The Psychological Effects of COVID-19 Pandemic Related Lockdown in Children. <i>Indian Pediatr.</i> 2020;57:1087.                                                                                                                     | Study design         |
| Bacaro V, Chiabudini M, Buonanno C, et al. Sleep characteristics in Italian children during home confinement due to COVID-19 outbreak. <i>Clin Neuropsychiatry.</i> 2021;18:13-27.                                                                              | Not relevant to PICO |
| Balasubramanian S, Rao NM, Goenka A. Coronavirus Disease 2019 (COVID-19) in Children - What We Know So Far and What We Do Not. <i>Indian Pediatr.</i> 2020;57:435-42.                                                                                           | Study design         |
| Bates L, Zieff G, Stanford K. COVID-19 Impact on Behaviors across the 24-Hour Day in Children and Adolescents: Physical Activity, Sedentary Behavior, and Sleep. <i>Children (Basel).</i> 2020;7:138.                                                           | Study design         |
| Bellomo TR, Prasad S, Munzer T. The impact of the COVID-19 pandemic on children with autism spectrum disorders. <i>J Pediatr Rehabil Med.</i> 2020;13:349-54.                                                                                                   | Study design         |
| Berard M, Rattaz C, Peries M, et al. Impact of containment and mitigation measures on children and youth with ASD during the COVID-19 pandemic: report from the ELENA cohort. <i>J Psychiatr Res.</i> 2021;137:73-80.                                           | Not relevant to PICO |
| Bertrand L, Schröder C, Bourgin P, et al. Sleep and circadian rhythm characteristics in individuals from the general population during the French COVID-19 full lockdown. <i>J Sleep Res.</i> Published Online First: 7 September 2021. doi: 10.1111/jsr.13480. | Not relevant to PICO |
| Biernesser C, Montano G, Miller E, et al. Social Media Use and Monitoring for Adolescents With Depression and Implications for the COVID-19 Pandemic: Qualitative Study of Parent and Child Perspectives. <i>JMIR Pediatr Parent.</i> 2020;3:e21644.            | Not relevant to PICO |
| Bösselmann V, Amatriain-Fernández S, Gronwald T, et al. Physical activity, boredom and fear of COVID-19 among adolescents in Germany. <i>Front Psychol.</i> 2021;12:624206.                                                                                     | Not relevant to PICO |
| Breidokienė R, Jusienė R, Urbonas V, et al. Sedentary behavior among 6-14-year-old children during the COVID-19 lockdown and its relation to physical and mental health. <i>Healthcare (Basel).</i> 2021;9(6):756.                                              | Not relevant to PICO |
| Cachón-Zagalaz J, Zagalaz-Sánchez M <sup>a</sup> L, Arufe-Giráldez V, et al. Physical Activity and Daily Routine among Children Aged 0-12 during the COVID-19 Pandemic in Spain. <i>Int J Environ Res Public Health.</i> 2021;18:703.                           | Not relevant to PICO |
| Chen CY, Chen IH, O'Brien KS, et al. CY. Psychological distress and internet-related behaviors between schoolchildren with and without overweight during the COVID-19 outbreak. <i>Int J Obes.</i> 2021;45:677-686.                                             | Not relevant to PICO |
| Chen Y, Osika W, Henriksson G, et al. Impact of COVID-19 pandemic on mental health and health behaviors in Swedish adolescents. <i>Scand J Public Health.</i> Published Online First: 8 June 2021. doi: 10.1177/14034948211021724.                              | Not relevant to PICO |
| Chia S, Chang S, Roy C. Effects of nationwide lockdown and school closures during the COVID-19 pandemic on children's physical health and beyond. <i>Singapore Med J.</i> Published Online First: 2 December 2020. doi: 10.11622/smedj.2020172                  | Study design         |
| Chugani CD, Houtrow A. Effect of the COVID-19 Pandemic on College Students With Disabilities. <i>Am J Public Health.</i> 2020;110:1722-3.                                                                                                                       | Study design         |

|                                                                                                                                                                                                                                                                       |                                                        |
|-----------------------------------------------------------------------------------------------------------------------------------------------------------------------------------------------------------------------------------------------------------------------|--------------------------------------------------------|
| Cipolla C, Curatola A, Ferretti S, et al. Eating habits and lifestyle in children with obesity during the COVID19 lockdown: a survey in an Italian center. <i>Acta Biomed.</i> 2021;92(2):e2021196.                                                                   | Not relevant to PICO                                   |
| Clemens V, Deschamps P, Fegert JM. Potential effects of “social” distancing measures and school lockdown on child and adolescent mental health. <i>Eur Child Adolesc Psychiatry.</i> 2020;29:739-42.                                                                  | Study design                                           |
| Dave H, Yagnik P. Psycho-social impact of COVID-19 pandemic on children in India: The reality. <i>Child Abuse Negl.</i> 2020;108:104663.                                                                                                                              | Study design                                           |
| De Figueiredo CS, Sandre PC, Portugal LCL. COVID-19 pandemic impact on children and adolescents' mental health: Biological, environmental, and social factors. <i>Prog Neuropsychopharmacol Biol Psychiatry.</i> 2021;106:110171.                                     | Study design                                           |
| Drogosz M, Pellegren J, Creegan E, et al. Implications of sports on COVID-19 cases in Rhode Island school-aged athletes. <i>R I Med J (2013).</i> 2021;104(5):51-54.                                                                                                  | Not relevant to PICO                                   |
| Dutta K, Mukherjee R, Sen D, Sahu S. Effect of COVID-19 lockdown on sleep behavior and screen exposure time: an observational study among Indian school children. <i>Biol Rhythm Res.</i> Published Online First: 14 October 2020. doi:10.1080/09291016.2020.1825284. | Error in reporting data                                |
| Eales L, Gillespie S, Alstat RA, et al. Children's screen and problematic media use in the United States before and during the COVID-19 pandemic. <i>Child Dev.</i> 2021;92(5):e866-e882. doi: 10.1111/cdev.13652.                                                    | Not relevant to PICO                                   |
| Fidancı İ, Aksoy H, Yengil Tacı D, et al. Evaluation of the effect of the COVID-19 pandemic on sleep disorders and nutrition in children. <i>Int J Clin Pract.</i> 2021;75(7):e14170.                                                                                 | Not relevant to PICO                                   |
| Fillon A, Genin P, Larras B, et al. France's 2020 report card on physical activity and sedentary behaviors in children and youth: results and progression. <i>J Phys Act Health.</i> 2021;18(7):811-7.                                                                | COVID-19 related data same with Chambonniere C, et al. |
| González-Rábago Y, Cabezas-Rodríguez A, Martín U. Social inequalities in health determinants in Spanish children during the COVID-19 lockdown. <i>Int J Environ Res Public Health.</i> 2021;18(8):4087.                                                               | Not relevant to PICO                                   |
| Hudimova A, Popovych I, Baidyk V, et al. The impact of social media on young web users' psychological well-being during the COVID-19 pandemic progression. <i>AMAZONIA Investiga.</i> 2021;10(39):50-61.                                                              | Not relevant to PICO                                   |
| Judge M. Covid 19, school closures and the uptake of a digital assessment for learning pilot project during Ireland's national lockdown. <i>Irish Educational Studies.</i> 2021;40(2):419-29.                                                                         | Not relevant to PICO                                   |
| Kerekes N, Bador K, Sfindla A, et al. Changes in adolescents' psychosocial functioning and well-being as a consequence of long-term COVID-19 restrictions. <i>Int J Environ Res Public Health.</i> 2021;18(16):8755.                                                  | Not relevant to PICO                                   |
| Kim D, Lee J. Addictive Internet gaming usage among Korean adolescents before and after the outbreak of the COVID-19 pandemic: a comparison of the latent profiles in 2018 and 2020. <i>Int J Environ Res Public Health.</i> 2021;18(14):7275.                        | Not relevant to PICO                                   |
| Kim SJ, Lee S, Han H, et al. Parental mental health and children's behaviors and media usage during COVID-19-related school closures. <i>J Korean Med Sci.</i> 2021;36(25):e184.                                                                                      | Not relevant to PICO                                   |
| Larsen L, Helland MS, Holt T. The impact of school closure and social isolation on children in vulnerable families during COVID-19: a focus on children's reactions. <i>Eur Child Adolesc Psychiatry.</i> 2021;26:1–11.                                               | Not relevant to PICO                                   |
| Latino F, Fischetti F, Cataldi S, et al. The impact of an 8-weeks at-home physical activity plan on academic achievement at the time of COVID-19 lockdown in Italian school. <i>Sustainability.</i> 2021;13:5812.                                                     | Not relevant to PICO                                   |
| Lecuelle F, Leslie W, Huguélet S. Did the COVID-19 lockdown really have no impact on young children's sleep? <i>J Clin Sleep Med.</i> 2020;16:2121.                                                                                                                   | Study design                                           |
| Levante A, Petrocchi S, Bianco F, et al. Psychological impact of COVID-19 outbreak on families of children with Autism Spectrum Disorder and typically developing peers: an online survey. <i>Brain Sci.</i> 2021;11(6):808.                                          | Not relevant to PICO                                   |

|                                                                                                                                                                                                                                                                                                      |                      |
|------------------------------------------------------------------------------------------------------------------------------------------------------------------------------------------------------------------------------------------------------------------------------------------------------|----------------------|
| Li X, Vanderloo LM, Maguire JL, et al. Public health preventive measures and child health behaviours during COVID-19: a cohort study. <i>Can J Public Health.</i> 2021;112(5):831-842.                                                                                                               | Not relevant to PICO |
| Lian Q, Zuo X, Zhong X, et al. The effect of COVID-19 school closures on adolescent sleep duration: an uncontrolled before-after study. <i>BMC Public Health.</i> 2021;21(1):1528.                                                                                                                   | Not relevant to PICO |
| Liu Q, Zhou Y, Xie X, et al. The prevalence of behavioral problems among school-aged children in home quarantine during the COVID-19 pandemic in China. <i>J Affect Disord.</i> 2021;279:412–6.                                                                                                      | Not relevant to PICO |
| López-Gil JF, Reis Gaya A, Reuter CP, et al. Sleep-related problems and eating habits during COVID-19 lockdown in a southern Brazilian youth sample. <i>Sleep Med.</i> 2021;85:150-156.                                                                                                              | Not relevant to PICO |
| Lorch M, Fuchs D. COVID-19: Effects of the Shutdown on Children and Families in Child and Youth Care Services in Germany. <i>Child Youth Serv.</i> 2020;41:290-2.                                                                                                                                    | Study design         |
| Lukavská K, Burda V, Lukavský J, et al. School-based prevention of screen-related risk behaviors during the long-term distant schooling caused by COVID-19 outbreak. <i>Int J Environ Res Public Health.</i> 2021;18(16):8561.                                                                       | Not relevant to PICO |
| Maltoni G, Zioutas M, Deiana G, et al. Gender differences in weight gain during lockdown due to COVID-19 pandemic in adolescents with obesity. <i>Nutr Metab Cardiovasc Dis.</i> 2021;31:2181-5.                                                                                                     | Not relevant to PICO |
| Margaritis I, Houdart S, El Ouadrhiri Y. How to deal with COVID-19 epidemic-related lockdown physical inactivity and sedentary increase in youth? Adaptation of Anses' benchmarks. <i>Arch Public Health.</i> 2020;78:52.                                                                            | Study design         |
| Matovu JKB, Kabwama SN, Ssekamatte T, et al. COVID-19 awareness, adoption of COVID-19 preventive measures, and effects of COVID-19 lockdown among adolescent boys and young men in Kampala, Uganda. <i>J Community Health.</i> 2021;46(4):842-853.                                                   | Not relevant to PICO |
| Miclea B, Trifu NR, Herta DC. Psychosocial features in children and adolescents during the COVID-19 pandemic. <i>Psihiatru.ro.</i> 2020;63:16-8.                                                                                                                                                     | Study design         |
| Montag C, Elhai JD. Discussing digital technology overuse in children and adolescents during the COVID-19 pandemic and beyond: On the importance of considering Affective Neuroscience Theory. <i>Addict Behav Rep.</i> 2020;12:100313.                                                              | Study design         |
| Morres ID, Galanis E, Hatzigeorgiadis A, et al. Physical activity, sedentariness, eating behaviour and well-being during a COVID-19 lockdown period in Greek adolescents. <i>Nutrients.</i> 2021;13(5):1449.                                                                                         | Not relevant to PICO |
| Nakachi K, Kawabe K, Hosokawa R, et al. Differences in psychological and behavioral changes between children following school closure due to COVID-19. <i>Psychiatry J.</i> 2021:5567732.                                                                                                            | Not relevant to PICO |
| Nakayama H, Matsuzaki T, Mihara S, et al. Change of Internet use and bedtime among Junior High School students after long-term school closure due to the Coronavirus Disease 2019 pandemic. <i>Children (Basel).</i> 2021;8(6):480.                                                                  | Not relevant to PICO |
| Nithya, G, Damodaran V, Mythili V. A study on impact of Corona Virus Disease 2019 Pandemic on activities of daily living, play, and sensory behaviors of children with autism spectrum disorder: a cross-sectional survey study. <i>The Indian Journal of Occupational Therapy.</i> 2021,53(2):p.64. | Not relevant to PICO |
| Pinchoff J, Santhya K, White C. Gender specific differences in COVID-19 knowledge, behavior and health effects among adolescents and young adults in Uttar Pradesh and Bihar, India. <i>PLoS One.</i> 2020;15:e0244053.                                                                              | Not relevant to PICO |
| Pombo A, Luz C, Rodrigues LP, et al. Correlates of children's physical activity during the COVID-19 confinement in Portugal. <i>Public Health.</i> 2020;189:14-19.                                                                                                                                   | Not relevant to PICO |
| Passanisi S, Pecoraro M, Pira F, et al. Quarantine due to the COVID-19 pandemic from the perspective of pediatric patients with type 1 diabetes: a web-based survey. <i>Front Pediatr.</i> 2020;8:491.                                                                                               | Not relevant to PICO |
| Roggio F, Trovato B, Ravalli S, et al. One year of COVID-19 pandemic in Italy: effect of sedentary behavior on physical activity levels and musculoskeletal pain among university students. <i>Int J Environ Res Public Health.</i> 2021;18(16):8680.                                                | Not relevant to PICO |

|                                                                                                                                                                                                                                                             |                      |
|-------------------------------------------------------------------------------------------------------------------------------------------------------------------------------------------------------------------------------------------------------------|----------------------|
| Sama BK, Kaur P, Thind PS, et al. Implications of COVID-19 induced nationwide lockdown on children's behaviour in Punjab, India. <i>Child Care Health Dev.</i> 2021;47:128-35.                                                                              | Study design         |
| Sancho NB, Mondragon NI, Santamaria MD, et al. The well-being of children with special needs during the COVID-19 lockdown: academic, emotional, social and physical aspects, <i>Eur J Spec Needs Educ.</i> 2021. doi: 10.1080/08856257.2021.1949093.        | Not relevant to PICO |
| Segre G, Campi R, Scarpellini F, et al. Interviewing children: the impact of the COVID-19 quarantine on children's perceived psychological distress and changes in routine. <i>BMC Pediatr.</i> 2021;21(1):231.                                             | Not relevant to PICO |
| Selden TM, Berdahl TA, Fang Z. The risk of severe COVID-19 within households of school employees and school-age children. <i>Health Affairs.</i> 2020;39:2002–9.                                                                                            | Not relevant to PICO |
| Spaull N, Van Der Berg S. Counting the cost: COVID-19 school closures in South Africa and its impact on children. <i>South African Journal of Childhood Education.</i> 2020;10:a924 doi:10.4102/sajce.v10i1.924.                                            | Not relevant to PICO |
| Štveráková T, Jačisko J, Busch A, et al. The impact of COVID-19 on physical activity of Czech children. <i>PLoS One.</i> 2021;16(7):e0254244.                                                                                                               | Not relevant to PICO |
| Theis N, Campbell N, De Leeuw J, et al. The effects of COVID-19 restrictions on physical activity and mental health of children and young adults with physical and/or intellectual disabilities. <i>Disabil Health J.</i> 2021;14:101064.                   | Not relevant to PICO |
| Telford DM, Signal DM, Hofman PL, et al. Physical activity in adolescents with and without type 1 diabetes during the New Zealand COVID-19 pandemic lockdown of 2020. <i>Int J Environ Res Public Health.</i> 2021;18(9):4475.                              | Not relevant to PICO |
| Torres González, C, Galindo-Aldana, G, García León, et al. COVID-19 voluntary social isolation and its effects in sociofamily and children's behavior. <i>Salud Mental.</i> 2020;43:263-71.                                                                 | Not relevant to PICO |
| Wang L, Zhang Y, Chen L, et al. Psychosocial and behavioral problems of children and adolescents in the early stage of reopening schools after the COVID-19 pandemic: a national cross-sectional study in China. <i>Transl Psychiatry.</i> 2021;11(1):342.  | Not relevant to PICO |
| Wang S, Zhang Y, Ding W. Psychological distress and sleep problems when people are under interpersonal isolation during an epidemic: A nationwide multicenter cross-sectional study. <i>European Psychiatry.</i> 2020;63:e77.                               | Not relevant to PICO |
| Wang X, Chen H, Liu L. Anxiety and Sleep Problems of College Students During the Outbreak of COVID-19. <i>Frontiers in Psychiatry.</i> 2020;11:588693.                                                                                                      | Not relevant to PICO |
| Wearick-Silva LE, Richter SA, Viola TW, et al. Sleep quality among parents and their children during COVID-19 pandemic in a Southern - Brazilian sample. <i>J Pediatr (Rio J).</i> Published Online First: 23 August 2021. doi: 10.1016/j.jped.2021.07.002. | Not relevant to PICO |
| Wright LJ, Williams SE, Veldhuijzen van Zanten JJCS. Physical activity protects against the negative impact of coronavirus fear on adolescent mental health and well-being during the COVID-19 pandemic. <i>Front Psychol.</i> 2021;12:580511.              | Not relevant to PICO |
| Xiang M-Q, Tan X-M, Sun J. Relationship of physical activity with anxiety and depression symptoms in Chinese college students during the COVID-19 outbreak. <i>Front Psychol.</i> 2020;11:582436.                                                           | Not relevant to PICO |
| Xiao S, Yan Z, Zhao L. Physical activity, screen time, and mood disturbance among Chinese adolescents during COVID-19. <i>J Psychosoc Nurs Ment Health Serv.</i> 2021;59(4):14-20.                                                                          | Not relevant to PICO |
| Yuan YQ, Ding JN, Bi N, et al. Physical activity and sedentary behaviour among children and adolescents with intellectual disabilities during the COVID-19 lockdown in China. <i>J Intellect Disabil Res.</i> Epub 2021 Nov 3. doi: 10.1111/jir.12898.      | Not relevant to PICO |
| Yeasmin S, Banik R, Hossain S, et al. Impact of COVID-19 pandemic on the mental health of children in Bangladesh: A cross-sectional study. <i>Child Youth Serv Rev.</i> 2020;117:105277.                                                                    | Not relevant to PICO |
| Zago M, Lovecchio N, Galli M. Players at home: physical activity and quality of life in 12–17 years-old football (soccer) players during the Covid-19 lockdown.                                                                                             | Not relevant to PICO |

|                                                                                                                                                                                                                                                     |                      |
|-----------------------------------------------------------------------------------------------------------------------------------------------------------------------------------------------------------------------------------------------------|----------------------|
| Int J Sports Sci Coach. Published Online First: 9 September 2021. doi: 10.1177/17479541211041703.                                                                                                                                                   |                      |
| Zhang X, Zhu W, Kang S, et al. Association between physical activity and mood states of children and adolescents in social isolation during the COVID-19 epidemic. <i>Int J Environ Res Public Health</i> . 2020;17:7666.                           | Not relevant to PICO |
| Zhang X, Dimitriou D, Halstead EJ. Sleep, anxiety, and academic performance: a study of adolescents from public high schools in China. <i>Front Psychol</i> . 2021;12:678839.                                                                       | Not relevant to PICO |
| Zhou J, Sie X, Guo B, et al. Impact of COVID-19 Lockdown on Physical Activity Among the Chinese Youths: The COVID-19 Impact on Lifestyle Change Survey (COINLICS). <i>Front Public Health</i> . 2021;9:592795.                                      | Not relevant to PICO |
| Zhu S, Zhuang Y, Lee P, et al. Leisure and problem gaming behaviors among children and adolescents during school closures caused by COVID-19 in Hong Kong: quantitative cross-sectional survey study. <i>JMIR Serious Games</i> . 2021;9(2):e26808. | Not relevant to PICO |
