# Supplementary material
Source: HighWire-hosted journal article supplement (https://gh.bmj.com/content/7/1/e007190)
Supplement: inline-supplementary-material-6 [file inline-supplementary-material-6.pdf]

Supplementary Table 3: Quality appraisal of qualitative studies (CASP tool) [36]

| Author, Year        | 1 | 2          | 3 | 4          | 5 | 6          | 7 | 8 | 9 | 10         | 11   |
|---------------------|---|------------|---|------------|---|------------|---|---|---|------------|------|
| Clarke, 2021 [58]   | Y | Y          | Y | Y          | Y | Can't tell | Y | Y | Y | Y          | Good |
| Esentürk, 2020 [62] | Y | Y          | Y | Can't tell | Y | Can't tell | Y | N | Y | Y          | Good |
| Eyler, 2021 [63]    | Y | Can't tell | N | Can't tell | Y | N          | N | Y | Y | Can't tell | Fair |

**1:** Was there a clear statement of the aims of the research? **2:** Is a qualitative methodology appropriate? **3:** Was the research design appropriate to address the aims of the research? **4:** Was the recruitment strategy appropriate to the aims of the research? **5:** Was the data collected in a way that addressed the research issue? **6:** Has the relationship between researcher and participants been adequately considered? **7:** Have ethical issues been taken into consideration? **8:** Was the data analysis sufficiently rigorous? **9:** Is there a clear statement of findings? **10:** How valuable is the research? **11:** Quality rating (Poor  $\leq$  3, Fair 4-5, Good  $\geq$  6)

Y = Yes

N = No

CASP = Critical Appraisal Skills Programme
